# Supplementary material for: Bringing metabolic networks to life: convenience rate law and thermodynamic constraints
Source: Springer Nature journal article supplement (doi:10.1186/1742-4682-3-41), 2006-12-01
Supplement: 12976_2006_104_MOESM1_ESM.pdf [file 12976_2006_104_MOESM1_ESM.pdf]

# Bringing metabolic networks to life: convenience rate law and thermodynamic constraints

## Supplementary material

Wolfram Liebermeister<sup>1\*</sup>, Edda Klipp<sup>1</sup>

<sup>1</sup>Computational Systems Biology, Max Planck Institute for Molecular Genetics,  
Ihnestraße 63-73, 14195 Berlin, Germany

Email: Wolfram Liebermeister - lieberme@molgen.mpg.de; Edda Klipp - klipp@molgen.mpg.de;

\*Corresponding author

### List of mathematical symbols

| Symbol                                       | Meaning                                                                   |
|----------------------------------------------|---------------------------------------------------------------------------|
| $N = (n_{il})$                               | stoichiometric matrix                                                     |
| $W = (w_{li})$                               | regulation matrix                                                         |
| $\mathbf{c} = (c_i)$                         | vector of metabolite concentrations                                       |
| $\mathbf{v} = (v_l)$                         | vector of reaction velocities                                             |
| $\mathbf{k}$                                 | vector of model parameters                                                |
| $G_i^{(0)}$                                  | Gibbs free energy of formation of metabolite $i$                          |
| $k_i^G$                                      | energy constant of metabolite $i$                                         |
| $k_l^V$                                      | velocity constant of reaction $l$                                         |
| $k_{li}^M$                                   | Michaelis-Menten constant of reaction $l$ and metabolite $i$              |
| $k_{li}^A$                                   | activation constant of reaction $l$ and metabolite $i$                    |
| $k_{li}^I$                                   | inhibition constant of reaction $l$ and metabolite $i$                    |
| $\mathbf{k}^{\text{eq}} = (k_l^{\text{eq}})$ | vector of equilibrium constants                                           |
| $\mathbf{k}^{\text{ind}}$                    | vector of independent equilibrium constants                               |
| $R_{\text{ind}}^{\text{eq}}$                 | matrix to compute $\mathbf{k}^{\text{eq}}$ from $\mathbf{k}^{\text{ind}}$ |
| $E_l$                                        | total enzyme concentration of reaction $l$                                |
| $k_{\pm l}^{\text{cat}}$                     | maximal turnover rates (forward and backward) of reaction $l$             |
| $v_{\pm l}^{\text{max}}$                     | maximal velocities (forward and backward) of reaction $l$                 |
| $\theta$                                     | vector of system parameters (logarithmic)                                 |
| $\mathbf{x}^*$                               | vector of kinetic data (logarithmic)                                      |
| $R_{\theta}^x$                               | matrix to predict $\mathbf{x}^*$ from $\theta$                            |

## Derivation of equation (22)

From definition (20), we obtain

$$\ln k_{-l}^{\text{cat}} = 2 \ln k_l^{\text{V}} - \ln k_{+l}^{\text{cat}}. \quad (1)$$

By inserting this into (17), equating to eqn. (18), and using definition (19), we obtain

$$-\sum_i n_{il} \ln k_i^{\text{G}} = 2 \ln k_{+l}^{\text{cat}} - 2 \ln k_l^{\text{V}} + \sum_i n_{il} \ln k_{ii}^{\text{M}}, \quad (2)$$

which can be solved for

$$\ln k_{+l}^{\text{cat}} = \ln k_l^{\text{V}} - \frac{1}{2} \sum_i n_{il} (\ln k_{ii}^{\text{M}} + \ln k_i^{\text{G}}). \quad (3)$$

Employing again the above eqn. (1), we obtain

$$\ln k_{-l}^{\text{cat}} = \ln k_l^{\text{V}} + \frac{1}{2} \sum_i n_{il} (\ln k_{ii}^{\text{M}} + \ln k_i^{\text{G}}). \quad (4)$$

Taking the exponential of (3) and (4) leads directly to equation (22).

## Computing the matrix $R_\theta^x$ : an example

The sensitivity matrix  $R_\theta^x$  relates the measured kinetic parameters  $\mathbf{x}^*$  to the independent system parameters  $\theta$ . Both  $\theta$  and  $\mathbf{x}^*$  contain logarithmic values. We demonstrate the construction of  $R_\theta^x$  with the following example network:

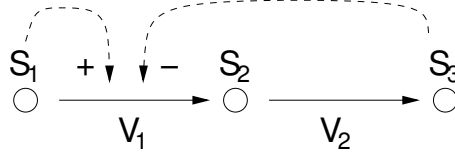

$S_1$  is a fixed metabolite and activates reaction  $V_1$ , while  $S_3$  inhibits reaction  $V_1$  (dashed arrows). The stoichiometric matrix and the regulation matrix read

$$N = \begin{pmatrix} -1 & 0 \\ 1 & -1 \\ 0 & 1 \end{pmatrix}, \quad W = \begin{pmatrix} 1 & 0 & -1 \\ 0 & 0 & 0 \end{pmatrix}. \quad (5)$$

We include the enzyme concentrations  $E_l$  into the model parameters and assume that all system parameters as well as equilibrium constants  $k_l^{\text{eq}}$ , turnover rates  $k_{\pm l}^{\text{cat}}$ , and maximal velocities  $v_{\pm}^{\text{max}}$  can be measured. The matrix  $R_\theta^x$  reads (dots represent zero elements):

$$\begin{array}{c}
k_1^G \quad k_2^G \quad k_3^G \quad k_1^V \quad k_2^V \quad k_{11}^M \quad k_{12}^M \quad k_{22}^M \quad k_{23}^M \quad k_{11}^A \quad k_{13}^I \quad E_1 \quad E_2 \\
\left( \begin{array}{cccccccccccccccc}
1 & \cdot \\
\cdot & 1 & \cdot \\
\cdot & \cdot & 1 & \cdot \\
\hline
\cdot & \cdot & \cdot & 1 & \cdot \\
\cdot & \cdot & \cdot & \cdot & 1 & \cdot \\
\hline
\cdot & \cdot & \cdot & \cdot & \cdot & 1 & \cdot \\
\cdot & \cdot & \cdot & \cdot & \cdot & \cdot & 1 & \cdot & \cdot & \cdot & \cdot & \cdot & \cdot \\
\cdot & 1 & \cdot & \cdot & \cdot & \cdot & \cdot \\
\hline
\cdot & 1 & \cdot & \cdot & \cdot \\
\cdot & 1 & \cdot & \cdot \\
\hline
\cdot & 1 & \cdot \\
\cdot & 1 \\
\hline
1 & -1 & \cdot \\
\cdot & 1 & -1 & \cdot \\
\hline
-\frac{1}{2} & \frac{1}{2} & \cdot & 1 & \cdot & \frac{1}{2} & -\frac{1}{2} & \cdot & \cdot & \cdot & \cdot & \cdot & \cdot \\
\cdot & -\frac{1}{2} & \frac{1}{2} & \cdot & 1 & \cdot & \cdot & \frac{1}{2} & -\frac{1}{2} & \cdot & \cdot & \cdot & \cdot \\
\frac{1}{2} & -\frac{1}{2} & \cdot & 1 & \cdot & -\frac{1}{2} & \frac{1}{2} & \cdot & \cdot & \cdot & \cdot & \cdot & \cdot \\
\cdot & \frac{1}{2} & -\frac{1}{2} & \cdot & 1 & \cdot & \cdot & -\frac{1}{2} & \frac{1}{2} & \cdot & \cdot & \cdot & \cdot \\
\hline
-\frac{1}{2} & \frac{1}{2} & \cdot & 1 & \cdot & \frac{1}{2} & -\frac{1}{2} & \cdot & \cdot & \cdot & \cdot & 1 & \cdot \\
\cdot & -\frac{1}{2} & \frac{1}{2} & \cdot & 1 & \cdot & \cdot & \frac{1}{2} & -\frac{1}{2} & \cdot & \cdot & \cdot & 1 \\
\frac{1}{2} & -\frac{1}{2} & \cdot & 1 & \cdot & -\frac{1}{2} & \frac{1}{2} & \cdot & \cdot & \cdot & \cdot & 1 & \cdot \\
\cdot & \frac{1}{2} & -\frac{1}{2} & \cdot & 1 & \cdot & \cdot & -\frac{1}{2} & \frac{1}{2} & \cdot & \cdot & \cdot & 1
\end{array} \right)
\end{array}$$

Its upper part corresponds to direct measurements of the system parameters; it is just an identity matrix. The lower part shows how the equilibrium constants, turnover rates, and maximal velocities depend on the system parameters, based on  $\ln \mathbf{k}^{\text{eq}} = -N^T \mathbf{k}^G$  (compare eqs. (18) and (22)). The sensitivity matrix  $R_\theta^x$  can be written in block matrix form

$$\begin{array}{c}
k^G \quad k^V \quad k^M \quad k^A \quad k^I \quad E \\
\left( \begin{array}{cccccc}
\mathbf{I} & \cdot & \cdot & \cdot & \cdot & \cdot \\
\cdot & \mathbf{I} & \cdot & \cdot & \cdot & \cdot \\
\cdot & \cdot & \mathbf{I} & \cdot & \cdot & \cdot \\
\cdot & \cdot & \cdot & \mathbf{I} & \cdot & \cdot \\
\cdot & \cdot & \cdot & \cdot & \mathbf{I} & \cdot \\
\cdot & \cdot & \cdot & \cdot & \cdot & \mathbf{I} \\
-N^T & \cdot & \cdot & \cdot & \cdot & \cdot \\
\frac{1}{2}N^T & \mathbf{I} & -\frac{1}{2}Z & \cdot & \cdot & \cdot \\
-\frac{1}{2}N^T & \mathbf{I} & \frac{1}{2}Z & \cdot & \cdot & \cdot \\
\frac{1}{2}N^T & \mathbf{I} & -\frac{1}{2}Z & \cdot & \cdot & \mathbf{I} \\
-\frac{1}{2}N^T & \mathbf{I} & \frac{1}{2}Z & \cdot & \cdot & \mathbf{I}
\end{array} \right)
\end{array}$$

where each column of the matrix  $Z$

$$\begin{matrix} & k_{11}^M & k_{12}^M & k_{22}^M & k_{23}^M \\ v_1 & \left( \begin{array}{cccc} -1 & 1 & \cdot & \cdot \\ \cdot & \cdot & -1 & 1 \end{array} \right) \\ v_2 & \end{matrix}$$

corresponds to one of the  $k_{li}^M$  values; it contains the stoichiometric coefficient for the corresponding  $l^{\text{th}}$  reaction and zeroes for all other reactions. For parameter estimation, we only consider the kinetic parameters that have been measured and collected in the vector  $\mathbf{x}^*$ . Hence, we use an incomplete sensitivity matrix, built only from those rows of  $R_{\theta}^x$  that correspond to the measured parameters.
