# Supplementary material for: Bringing metabolic networks to life: convenience rate law and thermodynamic constraints
Source: Springer Nature journal article supplement (doi:10.1186/1742-4682-3-41), 2006-12-01

v(a.u.) Convenience

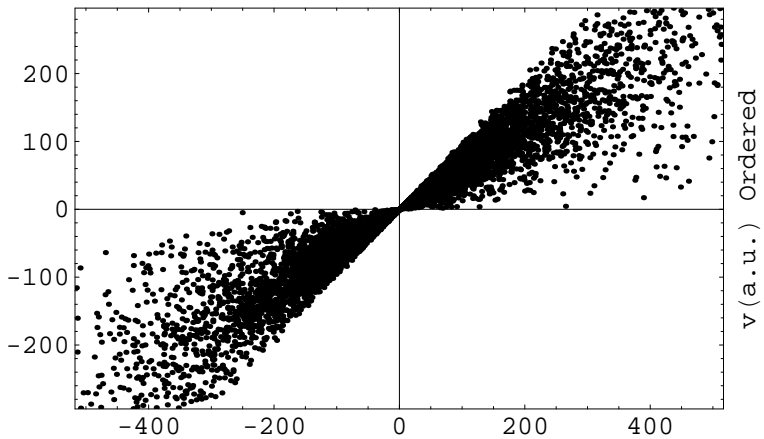

v(a.u.) Convenience

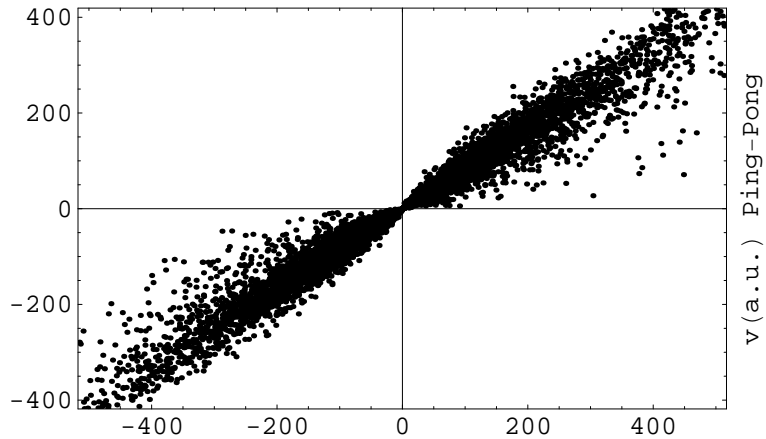

v(a.u.) Ping-Pong

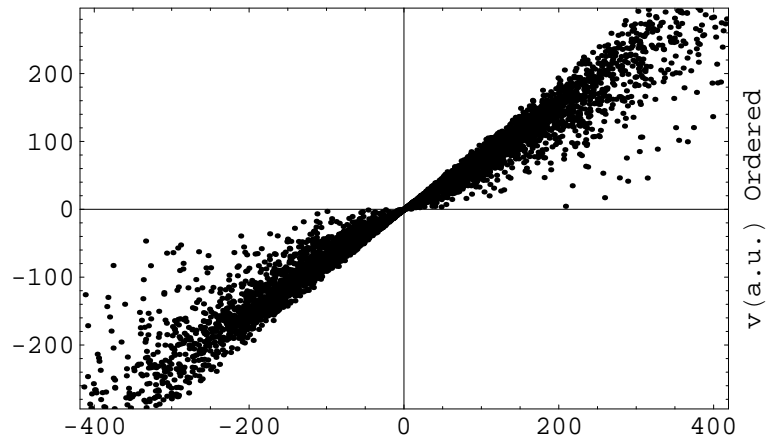

v(a.u.) Convenience

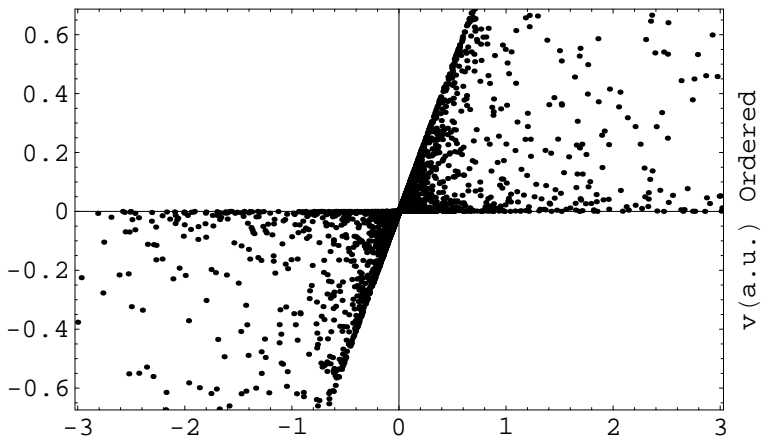

v(a.u.) Convenience

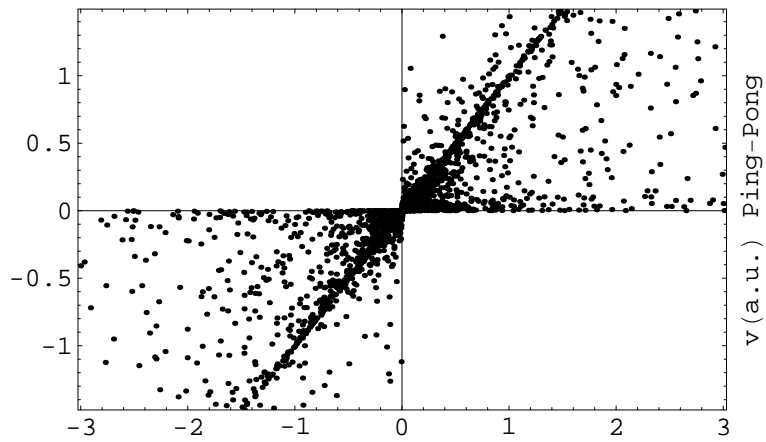

v(a.u.) Ping-Pong

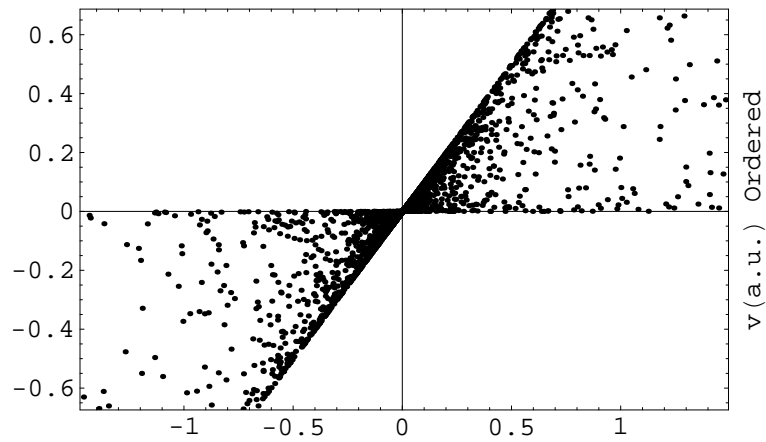

Supplement: 12976_2006_104_MOESM3_ESM.pdf [file 12976_2006_104_MOESM3_ESM.pdf]
